# Supplementary material
Source: PubMed Central journal article supplement (PMC5968038)
Supplement: NIHMS965954-supplement-supplement_1.pdf [file NIHMS965954-supplement-supplement_1.pdf]

## Supporting Information

**Tension-activated delivery of small molecules and proteins from superhydrophobic composites**

Julia Wang, Yolonda L. Colson, Mark W. Grinstaff\*

*Materials and Reagents:* Dichloromethane (reagent grade),  $\epsilon$ -caprolactone (97%), tin(II) octoate (~95%), N,N'-dicyclohexylcarbodiimide (DCC, >99%), stearic acid (95%), cisplatin (99.9%), anhydrous toluene, anhydrous dimethylformamide (99.8%), chloroform (reagent grade), methanol (reagent grade), polycaprolactone ( $M_w = 45$  kDa),  $\beta$ -galactosidase from *Aspergillus oryzae* (>8 units/mg), ortho-nitrophenyl- $\beta$ -galactoside (>98% enzymatic), and OE33 cells were purchased from Sigma-Aldrich. Palladium on carbon catalyst (10% on activated wood carbon) was purchased from Strem Chemicals, Inc. FD&C Yellow 5 (0.7 w/v%) and Blue 1 (5 w/v%) were available from McCormick & Co (Hunt Valley, MD). Non-woven hydroentangled cellulose and polyester blended meshes were available from Texwipe. Premium heat-inactivated fetal bovine serum (FBS) was purchased from Atlanta Biologicals. RPMI 1640 was available through Gibco and phosphate-buffered saline (PBS) without  $Mg^{2+}$  and  $Ca^{2+}$  was available through Corning.

*Device characterization:* Water contact angles (advancing =  $167^\circ$ , receding =  $143^\circ$ ) were measured with Kruss DSA100 goniometer. Mitutoyo 293 micrometer was used to determine depth of coating.

| Substrate loading      | Coating Thickness (100 $\mu\text{m}$ ) | Coating Thickness (200 $\mu\text{m}$ ) | Coating Thickness (350 $\mu\text{m}$ ) |
|------------------------|----------------------------------------|----------------------------------------|----------------------------------------|
| Dye                    | 113 +/- 11                             | 205 +/- 35                             | 360 +/- 21                             |
| $\beta$ -galactosidase | 107 +/- 9                              | 187 +/- 20                             | 364 +/- 30                             |
| Cisplatin              | 99 +/- 6                               | 208 +/- 9                              | 358 +/- 24                             |

**Table S1.** Measured coating thickness of fabricated mechanoresponsive devices.

Samples were imaged by scanning electron microscopy with Zeiss ZUPRA 40VP field emission SEM (acceleration voltage = 2 kV). Samples were placed on aluminum stubs with double-sided copper tape and sputtercoated with 5 nm of gold-palladium alloy to reduce charging.

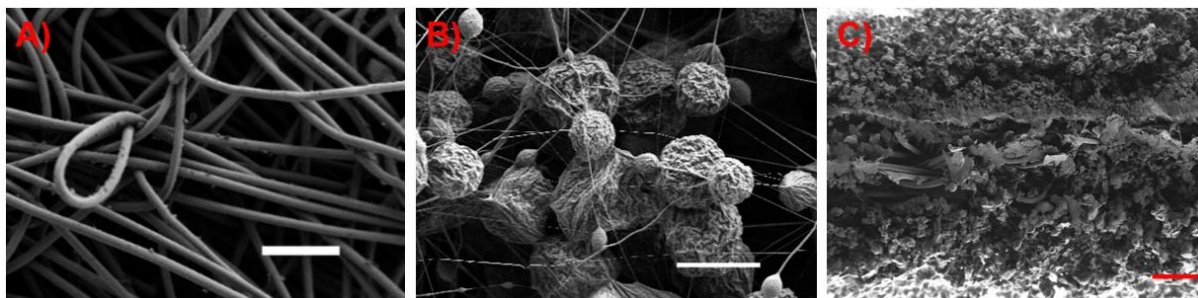

**Figure S1.** Scanning electron microscope images of A) core, B) coating, and C) composite with 100  $\mu\text{m}$  coating. Scale bars = 100  $\mu\text{m}$ , 10  $\mu\text{m}$ , and 100  $\mu\text{m}$  respectively.

*Tension-mediated release:* Devices were glued between two pieces of foam tape (3M Scotch), and placed between the grips of Instron 5848 tensile tester with 100 N load cell and submerged in a bath of PBS with 10% v/v FBS, or RPMI cell culture media (10% v/v FBS, cisplatin-loaded devices) with magnetic stir bar. All devices were stretched at 7% strain per second until the desired strain magnitude was reached. 2 mL aliquots were taken from the 300 mL bath at specified timepoints.

Dye concentrations were measured with HP 8453 UV-Visible spectrophotometer at 630 nm.

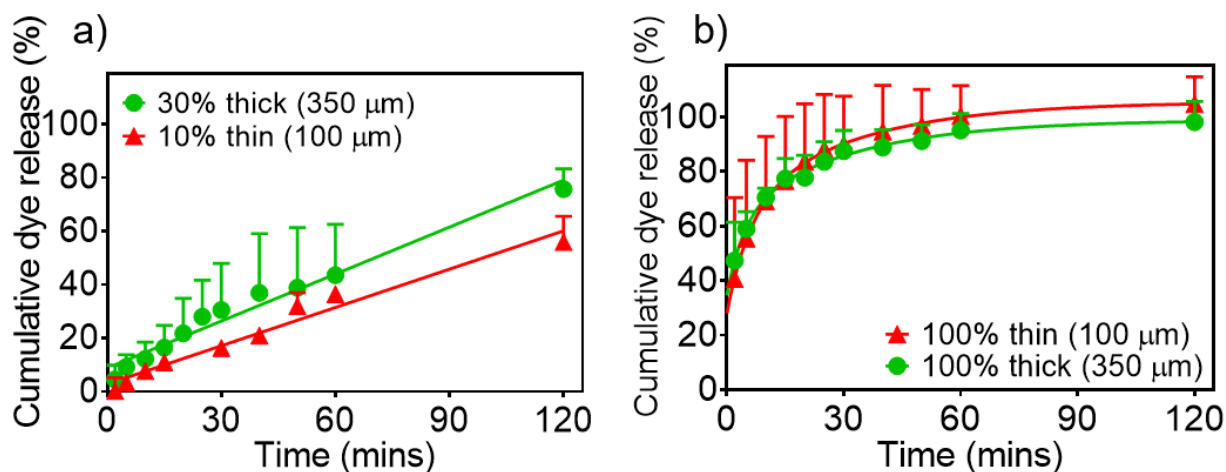

**Figure S2.** a) Similar release profiles of 100  $\mu\text{m}$  coating at 10% strain and 350  $\mu\text{m}$  coating at 30% strain. b) Release kinetics of dye from superhydrophobic coatings of 100  $\mu\text{m}$  and 350  $\mu\text{m}$  at 100% tensile strain. Error bars denote + SD, N = 3.

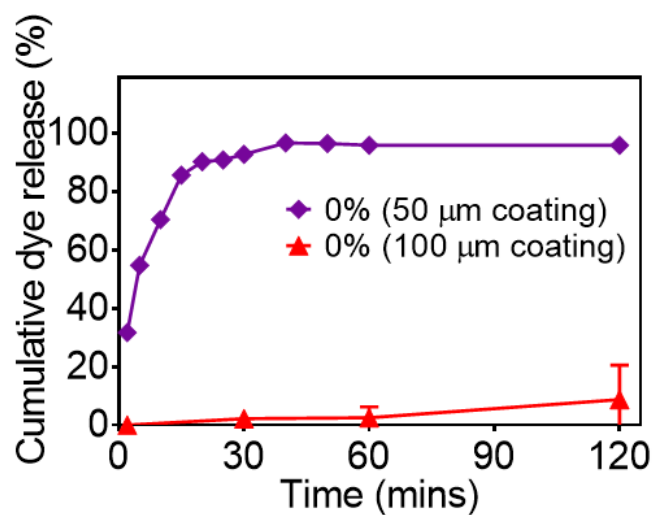

**Figure S3.** Release kinetics of dye in the absence of tensile strain (0%) with 100 μm superhydrophobic coating (N = 3, error bars = +/- SD) and 50 μm superhydrophobic coating (N = 1).
